# Supplementary material for: Polar Lipids of Commercial Ulva spp. of Different Origins: Profiling and Relevance for Seaweed Valorization
Source: MDPI journal article supplement (doi:10.3390/foods10050914), 2021-04-21
Supplement: s1 [file s1]

## Supplementary material

Article

# Polar lipids of commercial *Ulva* spp. of different origins: profiling and relevance for seaweed valorization

Ana S. P. Moreira<sup>1,2,\*</sup>, Elisabete da Costa<sup>2,3</sup>, Tânia Melo<sup>2,3</sup>, Diana Lopes<sup>2,3</sup>, Adriana C. S. Pais<sup>1</sup>, Sónia A. O. Santos<sup>1</sup>, Bárbara Pitarma<sup>4</sup>, Madalena Mendes<sup>4,5</sup>, Maria H. Abreu<sup>4</sup>, Pi Nyvall Collén<sup>6</sup>, Pedro Domingues<sup>2</sup>, M. Rosário Domingues<sup>2,3</sup>

<sup>1</sup> CICECO - Aveiro Institute of Materials, Department of Chemistry, Santiago University Campus, University of Aveiro, 3810-193 Aveiro, Portugal; ana.moreira@ua.pt; a.c.p.s@ua.pt; santos.sonia@ua.pt

<sup>2</sup> LAQV-REQUIMTE, Department of Chemistry, Santiago University Campus, University of Aveiro, 3810-193 Aveiro, Portugal; p.domingues@ua.pt

<sup>3</sup> CESAM - Centre for Environmental and Marine Studies, Department of Chemistry, Santiago University Campus, University of Aveiro, 3810-193 Aveiro, Portugal; elisabetecosta@ua.pt; taniamel@ua.pt; dianasalzedaslopes@ua.pt; mrd@ua.pt

<sup>4</sup> ALGApplus - Produção e Comercialização de Algas e seus Derivados, Lda., 3830-196 Ílhavo, Portugal; barbara.pitarma@algapplus.pt; madalena.mendes@algapplus.pt; helena.abreu@algapplus.pt

<sup>5</sup> Green Colab – Associação Oceano Verde, University of Algarve, Campus de Gambelas, 8005-139 Faro, Portugal;

<sup>6</sup> Amadeite SAS, Pôle biotechnologique du Haut du Bois, 56580 Bréhan, France; PNYvallCollen@olmix.com

\* Correspondence: ana.moreira@ua.pt

**Supplementary Table S1.** Glycolipids identified by LC–MS and MS/MS of *Ulva* spp. samples (mass error < 5 ppm).<sup>1</sup>

| Lipid species (C:N)                                        | Theoretical <i>m/z</i> | Observed <i>m/z</i> | Error (ppm) | Fatty acyl chain(s) | Formula    |
|------------------------------------------------------------|------------------------|---------------------|-------------|---------------------|------------|
| <b>MGMG identified as [M + NH<sub>4</sub>]<sup>+</sup></b> |                        |                     |             |                     |            |
| MGMG (16:4)                                                | 502.3016               | 502.3015            | -0.2170     | (16:4)              | C25H44NO9  |
| MGMG (16:3)                                                | 504.3173               | 504.3186            | 2.6590      | **                  | C25H46NO9  |
| MGMG (16:2)                                                | 506.3329               | 506.3335            | 1.1672      | **                  | C25H48NO9  |
| MGMG (16:1)                                                | 508.3486               | 508.3485            | -0.1161     | (16:1)              | C25H50NO9  |
| MGMG (16:0)                                                | 510.3642               | 510.3643            | 0.1959      | (16:0)              | C25H52NO9  |
| MGMG (18:4)                                                | 530.3329               | 530.3332            | 0.5487      | (18:4)              | C27H48NO9  |
| MGMG (22:5) <sup>#</sup>                                   | 584.3799               | 584.3797            | -0.2721     | **                  | C31H54NO9  |
| <b>DGMG identified as [M + NH<sub>4</sub>]<sup>+</sup></b> |                        |                     |             |                     |            |
| DGMG (14:0) <sup>§</sup>                                   | 644.3857               | 644.3871            | 2.1198      | **                  | C29H58NO14 |
| DGMG (16:4)                                                | 664.3544               | 664.3552            | 1.1530      | **                  | C31H54NO14 |
| DGMG (16:2)                                                | 668.3857               | 668.3868            | 1.5949      | **                  | C31H58NO14 |
| DGMG (16:1)                                                | 670.4014               | 670.4019            | 0.7697      | (16:1)              | C31H60NO14 |
| DGMG (16:0)                                                | 672.4170               | 672.4176            | 0.8923      | (16:0)              | C31H62NO14 |
| <b>MGDG identified as [M + NH<sub>4</sub>]<sup>+</sup></b> |                        |                     |             |                     |            |
| MGDG (32:8)                                                | 732.4687               | 732.4679            | -1.0922     | **                  | C41H66NO10 |
| MGDG (32:5)                                                | 738.5156               | 738.5172            | 2.1340      | **                  | C41H72NO10 |
| MGDG (32:4)                                                | 740.5307               | 740.5306            | -0.1350     | (16:4/16:0)         | C41H74NO10 |
| MGDG (32:0) <sup>#</sup>                                   | 748.5939               | 748.5930            | -1.1675     | (16:0/16:0)         | C41H82NO10 |
| MGDG (34:8)                                                | 760.5000               | 760.4999            | -0.0973     | (18:4/16:4)         | C43H70NO10 |
| MGDG (34:3)                                                | 770.5782               | 770.5783            | 0.0986      | (18:3/16:0)         | C43H80NO10 |
| MGDG (36:9)                                                | 786.5156               | 786.5187            | 3.9414      | **                  | C45H72NO10 |
| MGDG (36:8)                                                | 788.5313               | 788.5306            | -0.8497     | **                  | C45H74NO10 |
| MGDG (36:7)                                                | 790.5469               | 790.5478            | 1.1385      | **                  | C45H76NO10 |
| <b>DGDG identified as [M + NH<sub>4</sub>]<sup>+</sup></b> |                        |                     |             |                     |            |
| DGDG (32:4)                                                | 902.5841               | 902.5852            | 1.2187      | (16:4/16:0)         | C47H84O15N |
| DGDG (32:1)                                                | 908.6310               | 908.6302            | -0.8804     | (16:1/16:0)         | C47H90O15N |
| DGDG (32:0)                                                | 910.6467               | 910.6457            | -1.0981     | (16:0/16:0)         | C47H92O15N |
| DGDG (34:8)                                                | 922.5528               | 922.5519            | -0.9756     | (18:4/16:4)         | C49H80O15N |
| DGDG (34:6)                                                | 926.5841               | 926.5833            | -0.8634     | **                  | C49H84O15N |
| DGDG (34:5)                                                | 928.5997               | 928.6020            | 2.4768      | (18:1/16:4)         | C49H86O15N |
| DGDG (34:4)                                                | 930.6154               | 930.6180            | 2.7939      | **                  | C49H88O15N |
| DGDG (34:3)                                                | 932.6310               | 932.6318            | 0.8578      | (18:3/16:0)         | C49H90O15N |
| DGDG (34:2)                                                | 934.6467               | 934.6455            | -1.2839     | **                  | C49H92O15N |
| DGDG (34:1)                                                | 936.6623               | 936.6626            | 0.3203      | (18:1/16:0)         | C49H94O15N |
| DGDG (36:7)                                                | 952.5997               | 952.5976            | -2.2045     | **                  | C51H86O15N |
| DGDG (36:4)                                                | 958.6467               | 958.6458            | -0.9388     | (18:1/18:3)         | C51H92O15N |

**Supplementary Table S1.** [Continued]

| Lipid species<br>(C:N)                        | Theoretical $m/z$ | Observed $m/z$ | Error<br>(ppm) | Fatty acyl chain(s)         | Formula    |
|-----------------------------------------------|-------------------|----------------|----------------|-----------------------------|------------|
| <b>SQMG identified as [M - H]<sup>-</sup></b> |                   |                |                |                             |            |
| SQMG (14:0) <sup>§</sup>                      | 527.2526          | 527.2532       | 1.1152         | **                          | C23H43O11S |
| SQMG (16:1) <sup>§</sup>                      | 553.2683          | 553.2690       | 1.3339         | **                          | C25H45O11S |
| SQMG (16:0)                                   | 555.2839          | 555.2844       | 0.8788         | (16:0)                      | C25H47O11S |
| SQMG (18:3) <sup>§</sup>                      | 577.2683          | 577.2682       | -0.1074        | **                          | C27H45O11S |
| SQMG (18:1)                                   | 581.2996          | 581.3004       | 1.4433         | **                          | C27H49O11S |
| <b>SQDG identified as [M - H]<sup>-</sup></b> |                   |                |                |                             |            |
| SQDG (28:0) <sup>§</sup>                      | 737.4510          | 737.4516       | 0.8448         | (14:0/14:0) and (12:0/16:0) | C37H69O12S |
| SQDG (30:1) <sup>§</sup>                      | 763.4666          | 763.4666       | -0.0354        | (14:0/16:1)                 | C39H71O12S |
| SQDG (30:0)                                   | 765.4823          | 765.4831       | 1.0751         | (14:0/16:0)                 | C39H73O12S |
| SQDG (32:4)                                   | 785.4510          | 785.4529       | 2.4483         | (16:4/16:0)                 | C41H69O12S |
| SQDG (32:2)                                   | 789.4823          | 789.4831       | 1.0425         | **                          | C41H73O12S |
| SQDG (32:1)                                   | 791.4979          | 791.4991       | 1.4820         | (16:1/16:0) and (18:1/14:0) | C41H75O12S |
| SQDG (32:0)                                   | 793.5136          | 793.5140       | 0.5343         | (16:0/16:0)                 | C41H77O12S |
| SQDG (34:7) <sup>§</sup>                      | 807.4353          | 807.4347       | -0.7765        | **                          | C43H67O12S |
| SQDG (34:5) <sup>§</sup>                      | 811.4666          | 811.4643       | -2.8676        | **                          | C43H71O12S |
| SQDG (34:4)                                   | 813.4823          | 813.4827       | 0.5200         | (18:4/16:0)                 | C43H73O12S |
| SQDG (34:3)                                   | 815.4979          | 815.4987       | 0.9479         | (18:3/16:0)                 | C43H75O12S |
| SQDG (34:1)                                   | 819.5292          | 819.5296       | 0.4551         | (18:1/16:0)                 | C43H79O12S |
| SQDG (36:5)                                   | 839.4979          | 839.4969       | -1.2234        | **                          | C45H75O12S |
| SQDG (36:4)                                   | 841.5136          | 841.5139       | 0.3850         | **                          | C45H77O12S |
| SQDG (36:2)                                   | 845.5449          | 845.5427       | -2.5747        | (20:2/16:0)                 | C45H81O12S |
| SQDG (36:1)                                   | 847.5605          | 847.5596       | -1.0937        | **                          | C45H83O12S |
| SQDG (38:0)                                   | 877.6075          | 877.6076       | 0.1402         | **                          | C47H89O12S |

<sup>1</sup>Observed  $m/z$  and respective error were checked for all samples, but those presented were obtained from PT sample (replicate 1), or if absent in this sample, from FR sample (replicate 1). Numbers in parenthesis (C:N) indicate the number of carbon atoms (C) and double bonds (N) in the fatty acyl chains. \*\*, Lipid species identified only by retention time and mass accuracy. #, Not detected in PT samples. §, Not detected in FR samples.

**Supplementary Table S2.** Phospholipids identified by LC-MS and MS/MS of *Ulva* spp. samples (mass error < 5 ppm).<sup>1</sup>

| Lipid species<br>(C:N)                                                                                                                  | Theoretical<br>$m/z$ | Observed<br>$m/z$ | Error<br>(ppm) | Fatty acyl chain(s) | Formula    |
|-----------------------------------------------------------------------------------------------------------------------------------------|----------------------|-------------------|----------------|---------------------|------------|
| <b>PC identified as [M + H]<sup>+</sup></b><br>(determination of fatty acyl chains by MS/MS of [M + CH <sub>3</sub> COO] <sup>-</sup> ) |                      |                   |                |                     |            |
| PC (30:0)                                                                                                                               | 706.5387             | 706.5384          | -0.3991        | *                   | C38H77NO8P |
| PC (32:2)                                                                                                                               | 730.5387             | 730.5383          | -0.5229        | (16:1/16:1)         | C40H77NO8P |
| PC (32:1)                                                                                                                               | 732.5543             | 732.5530          | -1.8169        | (16:0/16:1)         | C40H79NO8P |
| PC (34:3)                                                                                                                               | 756.5543             | 756.5526          | -2.2880        | **                  | C42H79NO8P |
| PC (34:2)                                                                                                                               | 758.5700             | 758.5699          | -0.1081        | (16:1/18:1)         | C42H81NO8P |
| PC (34:1)                                                                                                                               | 760.5856             | 760.5849          | -0.9624        | (16:0/18:1)         | C42H83NO8P |
| PC (36:5)                                                                                                                               | 780.5543             | 780.5531          | -1.5771        | *                   | C44H79NO8P |
| PC (36:4)                                                                                                                               | 782.5700             | 782.5672          | -3.5550        | **                  | C44H81NO8P |
| PC (36:3)                                                                                                                               | 784.5856             | 784.5843          | -1.6977        | (18:1/18:2)         | C44H83NO8P |

**Supplementary Table S2.** [Continued]

| Lipid species (C:N)                                                                                                                      | Theoretical <i>m/z</i> | Observed <i>m/z</i> | Error (ppm) | Fatty acyl chain(s)         | Formula    |
|------------------------------------------------------------------------------------------------------------------------------------------|------------------------|---------------------|-------------|-----------------------------|------------|
| PC (36:2)                                                                                                                                | 786.6013               | 786.6015            | 0.2771      | (18:1/18:1)                 | C44H85NO8P |
| PC (38:6)                                                                                                                                | 806.5700               | 806.5689            | -1.3415     | *                           | C46H81NO8P |
| PC (38:5)                                                                                                                                | 808.5856               | 808.5837            | -2.3894     | **                          | C46H83NO8P |
| <b>LPC identified as [M + H]<sup>+</sup></b><br>(determination of fatty acyl chains by MS/MS of [M + CH <sub>3</sub> COO] <sup>-</sup> ) |                        |                     |             |                             |            |
| LPC (14:0)                                                                                                                               | 468.3090               | 468.3087            | -0.6769     | (14:0)                      | C22H47NO7P |
| LPC (16:1)                                                                                                                               | 494.3247               | 494.3245            | -0.3378     | (16:1)                      | C24H49NO7P |
| LPC (16:0)                                                                                                                               | 496.3403               | 496.3404            | 0.1692      | (16:0)                      | C24H51NO7P |
| LPC (18:4)                                                                                                                               | 516.3090               | 516.3071            | -3.7129     | **                          | C26H47NO7P |
| LPC (18:3)                                                                                                                               | 518.3247               | 518.3222            | -4.7596     | **                          | C26H49NO7P |
| LPC (18:1)                                                                                                                               | 522.3560               | 522.3560            | 0.0632      | (18:1)                      | C26H53NO7P |
| LPC (20:5)                                                                                                                               | 542.3247               | 542.3237            | -1.7831     | (20:5)                      | C28H49NO7P |
| LPC (20:4)                                                                                                                               | 544.3403               | 544.3390            | -2.4176     | *                           | C28H51NO7P |
| LPC (22:6)                                                                                                                               | 568.3403               | 568.3407            | 0.6757      | **                          | C30H51NO7P |
| <b>PE identified as identified as [M - H]<sup>-</sup></b><br>(confirmation of PE polar head by MS/MS of [M + H] <sup>+</sup> )           |                        |                     |             |                             |            |
| PE (30:1)                                                                                                                                | 660.4604               | 660.4609            | 0.7086      | (14:0/16:1)                 | C35H67NO8P |
| PE (32:2)                                                                                                                                | 686.4761               | 686.4768            | 1.0459      | (16:1/16:1)                 | C37H69O8NP |
| PE (32:1)                                                                                                                                | 688.4917               | 688.4922            | 0.6797      | (16:0/16:1)                 | C37H71NO8P |
| PE (34:2)                                                                                                                                | 714.5074               | 714.5077            | 0.4451      | (16:1/18:2)                 | C39H73NO8P |
| PE (34:1)                                                                                                                                | 716.5230               | 716.5219            | -1.5799     | **                          | C39H75NO8P |
| PE (36:2)                                                                                                                                | 742.5387               | 742.5406            | 2.5830      | **                          | C41H77NO8P |
| <b>LPE identified as [M - H]<sup>-</sup></b><br>(confirmation of PE polar head by MS/MS of [M + H] <sup>+</sup> )                        |                        |                     |             |                             |            |
| LPE (16:1)                                                                                                                               | 450.2621               | 450.2629            | 1.8500      | (16:1)                      | C21H41NO7P |
| LPE (16:0)                                                                                                                               | 452.2777               | 452.2783            | 1.2890      | (16:0)                      | C21H43NO7P |
| LPE (18:2) <sup>§</sup>                                                                                                                  | 476.2777               | 476.2782            | 1.0141      | **                          | C23H43NO7P |
| LPE (18:1)                                                                                                                               | 478.2934               | 478.2938            | 0.9053      | **                          | C23H45NO7P |
| LPE (20:4)                                                                                                                               | 500.2777               | 500.2782            | 0.9655      | **                          | C25H43NO7P |
| LPE (22:5)                                                                                                                               | 526.2934               | 526.2935            | 0.2527      | *                           | C27H45NO7P |
| <b>PI identified as [M - H]<sup>-</sup></b>                                                                                              |                        |                     |             |                             |            |
| PI (34:2)                                                                                                                                | 833.5180               | 831.4999            | -3.0066     | (16:0/18:2)                 | C43H78O13P |
| PI (34:3)                                                                                                                                | 831.5024               | 833.5140            | -4.7989     | (16:0/18:3)                 | C43H76O13P |
| PI (34:1)                                                                                                                                | 835.5337               | 835.5298            | -4.6677     | (16:0/18:1)                 | C43H80O13P |
| <b>LPI identified as [M - H]<sup>-</sup></b>                                                                                             |                        |                     |             |                             |            |
| LPI (16:0)                                                                                                                               | 571.2883               | 571.2896            | 2.2020      | (16:0)                      | C25H48O12P |
| <b>PG identified as [M - H]<sup>-</sup></b>                                                                                              |                        |                     |             |                             |            |
| PG (30:1)                                                                                                                                | 691.4550               | 691.4562            | 1.7355      | (14:0/16:1)                 | C36H68O10P |
| PG (32:2)                                                                                                                                | 717.4707               | 717.4713            | 0.8363      | (16:1/16:1)                 | C38H70O10P |
| PG (32:1)                                                                                                                                | 719.4863               | 719.4866            | 0.4170      | (16:0/16:1) and (14:0/18:1) | C38H72O10P |
| PG (34:5)                                                                                                                                | 739.4550               | 739.4558            | 1.0819      | (16:1/18:4) and (16:2/18:3) | C40H68O10P |
| PG (34:4)                                                                                                                                | 741.4707               | 741.4711            | 0.5395      | (16:1/18:3)                 | C40H70O10P |
| PG (34:3)                                                                                                                                | 743.4863               | 743.4847            | -2.1520     | (16:1/18:2) and (16:0/18:3) | C40H72O10P |

**Supplementary Table S2.** [Continued]

| Lipid species (C:N)                          | Theoretical <i>m/z</i> | Observed <i>m/z</i> | Error (ppm) | Fatty acyl chain(s)         | Formula    |
|----------------------------------------------|------------------------|---------------------|-------------|-----------------------------|------------|
| PG (34:2)                                    | 745.5020               | 745.5023            | 0.4024      | (16:1/18:1) and (16:0/18:2) | C40H74O10P |
| PG (36:3)                                    | 771.5176               | 771.5182            | 0.7777      | (18:1/18:2)                 | C42H76O10P |
| PG (36:2)                                    | 773.5333               | 773.5335            | 0.2586      | (18:1/18:1)                 | C42H78O10P |
| <b>LPG identified as [M - H]<sup>-</sup></b> |                        |                     |             |                             |            |
| LPG (16:1)                                   | 481.2566               | 481.2572            | 1.1470      | (16:1)                      | C22H42O9P  |
| LPG (16:0)                                   | 483.2723               | 483.2734            | 2.2803      | (16:0)                      | C22H44O9P  |
| LPG (18:3)                                   | 505.2566               | 505.2582            | 3.0717      | **                          | C24H42O9P  |
| LPG (18:1)                                   | 509.2879               | 509.2886            | 1.2802      | **                          | C24H46O9P  |

<sup>1</sup>Observed *m/z* and respective error were checked for all samples, but those presented were obtained from PT sample (replicate 1), or if absent in this sample, from FR sample (replicate 1). Numbers in parenthesis (C:N) indicate the number of carbon atoms (C) and double bonds (N) in the fatty acyl chains. \*, Lipid species identified by retention time, mass accuracy and MS/MS of [M + H]<sup>+</sup> (without MS/MS in negative ion mode to confirm fatty acyl chains). \*\*, Lipid species identified only by retention time and mass accuracy.

**Supplementary Table S3.** Betaine lipids identified by LC-MS and MS/MS of *Ulva* spp. samples (mass error < 5 ppm).<sup>1</sup>

| Lipid species (C:N)                           | Theoretical <i>m/z</i> | Observed <i>m/z</i> | Error (ppm) | Fatty acyl chain(s)                      | Formula   |
|-----------------------------------------------|------------------------|---------------------|-------------|------------------------------------------|-----------|
| <b>DGTS identified as [M + H]<sup>+</sup></b> |                        |                     |             |                                          |           |
| DGTS (28:0)                                   | 656.5465               | 656.5463            | -0.3046     | (12:0/16:0) and (14:0/14:0)              | C38H74O7N |
| DGTS (30:4)                                   | 676.5152               | 676.5152            | 0.0000      | **                                       | C40H70O7N |
| DGTS (30:1)                                   | 682.5622               | 682.5621            | -0.1465     | (14:0/16:1) and (14:1/16:0)              | C40H76O7N |
| DGTS (30:0)                                   | 684.5778               | 684.5780            | 0.2922      | (14:0/16:0)                              | C40H78O7N |
| DGTS (32:4)                                   | 704.5465               | 704.5465            | 0.0000      | (14:0/18:4) and (16:0/16:4)              | C42H74O7N |
| DGTS (32:3)                                   | 706.5622               | 706.5617            | -0.7077     | **                                       | C42H76O7N |
| DGTS (32:2)                                   | 708.5778               | 708.5781            | 0.4234      | (16:1/16:1) and (16:0/16:2)              | C42H78O7N |
| DGTS (32:1)                                   | 710.5935               | 710.5934            | -0.1407     | (16:0/16:1) and (14:0/18:1)              | C42H80O7N |
| DGTS (32:0)                                   | 712.6091               | 712.6080            | -1.5436     | (16:0/16:0)                              | C42H82O7N |
| DGTS (34:8)                                   | 724.5152               | 724.5167            | 2.0303      | (16:4/18:4)                              | C44H70O7N |
| DGTS (34:7)                                   | 726.5309               | 726.5290            | -2.5863     | **                                       | C44H72O7N |
| DGTS (34:6)                                   | 728.5465               | 728.5461            | -0.5490     | (16:2/18:4), (16:4/18:2) and (16:1/18:3) | C44H74O7N |
| DGTS (34:5)                                   | 730.5622               | 730.5625            | 0.4106      | (16:4/18:1)                              | C44H76O7N |
| DGTS (34:4)                                   | 732.5778               | 732.5776            | -0.2730     | (16:0/18:4) and (16:1/18:3)              | C44H78O7N |
| DGTS (34:3)                                   | 734.5935               | 734.5927            | -1.0890     | (16:0/18:3)                              | C44H80O7N |
| DGTS (34:2)                                   | 736.6091               | 736.6085            | -0.8145     | (16:0/18:2) and (16:1/18:1)              | C44H82O7N |
| DGTS (34:1)                                   | 738.6248               | 738.6244            | -0.5415     | (16:0/18:1) and (16:1/18:0)              | C44H84O7N |
| DGTS (36:8)                                   | 752.5465               | 752.5458            | -0.9568     | (18:4/18:4)                              | C46H74O7N |
| DGTS (36:7)                                   | 754.5622               | 754.5600            | -2.9156     | (18:3/18:4) and (18:2/18:5) <sup>◇</sup> | C46H76O7N |
| DGTS (36:6)                                   | 756.5778               | 756.5761            | -2.2470     | **                                       | C46H78O7N |
| DGTS (36:5)                                   | 758.5935               | 758.5935            | 0.0000      | (18:1/18:4)                              | C46H80O7N |

**Supplementary Table S3.** [Continued]

| Lipid species (C:N)                           | Theoretical $m/z$ | Observed $m/z$ | Error (ppm) | Fatty acyl chain(s)                                   | Formula   |
|-----------------------------------------------|-------------------|----------------|-------------|-------------------------------------------------------|-----------|
| DGTS (36:4)                                   | 760.6091          | 760.6081       | -1.3147     | (18:0/18:4), (18:1/18:3) and (16:0/20:4) <sup>◊</sup> | C46H82O7N |
| DGTS (36:2)                                   | 764.6404          | 764.6404       | 0.0000      | (18:1/18:1) and (16:0/20:2)                           | C46H86O7N |
| DGTS (38:9)                                   | 778.5622          | 778.5597       | -3.2110     | (20:5/18:4) and (16:4/22:5)                           | C48H76O7N |
| DGTS (38:8)                                   | 780.5778          | 780.5761       | -2.1779     | **                                                    | C48H78O7N |
| DGTS (38:7)                                   | 782.5935          | 782.5905       | -3.8334     | (20:4/18:3)                                           | C48H80O7N |
| DGTS (38:6)                                   | 784.6091          | 784.6071       | -2.5490     | (16:1/22:5) and (20:4/18:2)                           | C48H82O7N |
| DGTS (38:5)                                   | 786.6248          | 786.6249       | 0.1271      | (16:0/22:5) and (20:4/18:1)                           | C48H84O7N |
| DGTS (38:0)                                   | 796.7030          | 796.7014       | -2.0083     | (16:0/22:0)                                           | C48H94O7N |
| DGTS (40:9)                                   | 806.5935          | 806.5944       | 1.1158      | (22:5/18:4)                                           | C50H80O7N |
| DGTS (40:8)                                   | 808.6091          | 808.6081       | -1.2367     | **                                                    | C50H82O7N |
| DGTS (40:7)                                   | 810.6248          | 810.6229       | -2.3439     | **                                                    | C50H84O7N |
| DGTS (40:6)                                   | 812.6404          | 812.6410       | 0.7383      | **                                                    | C50H86O7N |
| DGTS (40:4)                                   | 816.6717          | 816.6736       | 2.3265      | (22:0/18:4)                                           | C50H90O7N |
| DGTS (42:10)                                  | 832.6091          | 832.6093       | 0.2066      | (22:5/20:5)                                           | C52H82O7N |
| DGTS (44:10)                                  | 860.6404          | 860.6398       | -0.7309     | (22:5/22:5)                                           | C54H86O7N |
| <b>MGTS identified as [M + H]<sup>+</sup></b> |                   |                |             |                                                       |           |
| MGTS (14:0)                                   | 446.3482          | 446.3479       | -0.5915     | (14:0)                                                | C24H48O6N |
| MGTS (16:4)                                   | 466.3169          | 466.3169       | 0.0772      | (16:4)                                                | C26H44O6N |
| MGTS (16:2)                                   | 470.3482          | 470.3483       | 0.2891      | (16:2)                                                | C26H48O6N |
| MGTS (16:1)                                   | 472.3638          | 472.3639       | 0.1821      | (16:1)                                                | C26H50O6N |
| MGTS (16:0)                                   | 474.3795          | 474.3792       | -0.6324     | (16:0)                                                | C26H52O6N |
| MGTS (18:5)                                   | 492.3325          | 492.3307       | -3.6845     | (18:5) <sup>◊</sup>                                   | C28H46O6N |
| MGTS (18:4)                                   | 494.3482          | 494.3474       | -1.5455     | (18:4)                                                | C28H48O6N |
| MGTS (18:3)                                   | 496.3638          | 496.3628       | -2.0429     | (18:3) <sup>◊</sup>                                   | C28H50O6N |
| MGTS (18:1)                                   | 500.3951          | 500.3947       | -0.8273     | (18:1)                                                | C28H54O6N |
| MGTS (20:5)                                   | 520.3638          | 520.3633       | -0.9878     | (20:5)                                                | C30H50O6N |
| MGTS (20:4)                                   | 522.3795          | 522.3779       | -2.9940     | (20:4) <sup>◊</sup>                                   | C30H52O6N |
| MGTS (20:1)                                   | 528.4264          | 528.4261       | -0.5942     | (20:1)                                                | C30H58O6N |
| MGTS (20:0)                                   | 530.4421          | 530.4421       | 0.0679      | (20:0)                                                | C30H60O6N |
| MGTS (22:5)                                   | 548.3951          | 548.3952       | 0.1568      | (22:5)                                                | C32H54O6N |
| MGTS (22:0)                                   | 558.4734          | 558.4733       | -0.1146     | (22:0)                                                | C32H64O6N |

<sup>1</sup> Observed  $m/z$  and respective error were checked for all samples, but those presented were obtained from PT sample (replicate 1), or if absent in this sample, from FR sample (replicate 1). Numbers in parenthesis (C:N) indicate the number of carbon atoms (C) and double bonds (N) in the fatty acyl chains. <sup>◊</sup>, with contribution of sodium adducts. \*\*, Lipid species identified only by retention time and mass accuracy.

**Supplementary Table S4.** Literature review data on the proximate composition and fatty acid profile (obtained by analysis of fatty acid methyl ester derivatives) found for *Ulva* genus in this study and other published studies.

| Reference               | Sample                 | Wild or cultivation | Location                         | Harvest time   | Proximate composition (%DW) <sup>a</sup> |                       |                     |                     | Most abundant FA (% of total FA) <sup>c</sup>                                                      |
|-------------------------|------------------------|---------------------|----------------------------------|----------------|------------------------------------------|-----------------------|---------------------|---------------------|----------------------------------------------------------------------------------------------------|
|                         |                        |                     |                                  |                | Ash                                      | Proteins <sup>b</sup> | Sugars <sup>c</sup> | Lipids <sup>d</sup> |                                                                                                    |
| This study              | <i>Ulva rigida</i>     | Cultivation         | Ria de Aveiro, Portugal          | May 2017       | 32.5                                     | 11.1                  | 55.2                | 1.1                 | 16:0 (42), 18:1 (21), 18:3 $n$ -3 (5), 16:1 $n$ -7 (5), 18:0 (4), 18:4 $n$ -3 (4)                  |
|                         | <i>Ulva</i> spp.       | Wild                | Brittany, France                 |                | 13.6                                     | 15.6                  | 68.6                | 2.2                 | 16:0 (36), 18:4 $n$ -3 (14), 16:4 $n$ -3 (10), 18:1 (9), 18:0 (6), 18:3 $n$ -3 (6)                 |
| Fleurence et al. [1]    | <i>Ulva rotundata</i>  | Wild                | Brittany, France                 | Dec 1991       |                                          |                       |                     | 1.9                 | 16:0 (34), 18:4 $n$ -3 (14), 18:1 $n$ -7 (14), 16:4 $n$ -3 (10), 18:3 $n$ -3 (10), 16:1 $n$ -7 (4) |
| Nelson et al. [2]       | <i>Ulva lobata</i>     | Wild                | San Diego, California            | Dec 1997       |                                          |                       |                     | 2.5                 | 16:0 (22), 18:3 $n$ -3 (21), C16 PUFA (20), 18:4 $n$ -3 (12), 18:1 $n$ -7 (8), 18:2 $n$ -6 (4)     |
|                         |                        | Wild                | San Diego, California            | March 1998     |                                          |                       |                     | 2.9                 | 18:3 $n$ -3 (25), 16:0 (21), C16 PUFA (20), 18:4 $n$ -3 (14), 18:1 $n$ -7 (7), 16:1 $n$ -13 (4)    |
|                         |                        | Wild                | San Diego, California            | July 1998      |                                          |                       |                     | 2.0                 | 16:0 (28), 18:3 $n$ -3 (17), C16 PUFA (15), 18:2 $n$ -6 (11), 18:1 $n$ -7 (9), 18:4 $n$ -3 (7)     |
|                         |                        | Wild                | San Diego, California            | Oct 1998       |                                          |                       |                     | 2.1                 | 16:0 (25), 18:3 $n$ -3 (24), C16 PUFA (17), 18:4 $n$ -3 (12), 18:1 $n$ -7 (9), 16:1 $n$ -13 (3)    |
| Kumari et al. [3]       | <i>Ulva tubulosa</i>   | Wild                | Coast of Gujarat, India          | Jan-April 2008 |                                          |                       |                     | 2.1                 | 16:0 (49), 18:1 $n$ -9 (19), 18:2 $n$ -6 (11), 22:6 $n$ -3 (5), 18:0 (4), 20:5 $n$ -3 (2)          |
|                         | <i>Ulva linza</i>      | Wild                | Coast of Gujarat, India          | Jan-April 2008 |                                          |                       |                     | 2.1                 | 16:0 (41), 18:1 $n$ -9 (15), 18:2 $n$ -6 (11), 22:6 $n$ -3 (6), 20:5 $n$ -3 (4), 18:0 (4)          |
|                         | <i>Ulva fasciata</i>   | Wild                | Coast of Gujarat, India          | Jan-April 2008 |                                          |                       |                     | 1.8                 | 16:0 (53), 18:1 $n$ -9 (12), 18:2 $n$ -6 (12), 22:6 $n$ -3 (6), 18:0 (4), 20:5 $n$ -3 (2)          |
|                         | <i>Ulva rigida</i>     | Wild                | Coast of Gujarat, India          | Jan-April 2008 |                                          |                       |                     | 2.0                 | 16:0 (48), 18:1 $n$ -9 (19), 18:2 $n$ -6 (9), 22:6 $n$ -3 (6), 18:0 (4), 16:1 $n$ -7 (4)           |
|                         | <i>Ulva reticulata</i> | Wild                | Coast of Gujarat, India          | Jan-April 2008 |                                          |                       |                     | 2.0                 | 16:0 (52), 18:1 $n$ -9 (17), 18:2 $n$ -6 (8), 18:0 (6), 16:1 $n$ -7 (4), 22:6 $n$ -3 (3)           |
|                         | <i>Ulva lactuca</i>    | Wild                | Coast of Gujarat, India          | Jan-April 2008 |                                          |                       |                     | 1.3                 | 16:0 (43), 18:1 $n$ -9 (18), 18:2 $n$ -6 (9), 16:1 $n$ -7 (6), 18:0 (3), 18:3 $n$ -6 (3)           |
|                         | <i>Ulva</i> sp.        | Wild                | Coast of Gujarat, India          | Jan-April 2008 |                                          |                       |                     | 1.8                 | 16:0 (50), 18:1 $n$ -9 (16), 18:2 $n$ -6 (10), 16:1 $n$ -7 (4), 14:1 (4), 22:6 $n$ -3 (3)          |
| van Ginneken et al. [4] | <i>Ulva lactuca</i>    | Wild                | Eastern Scheldt, the Netherlands | Sep-Oct 2009   |                                          |                       |                     | 2.2                 | 18:2 (25), 18:3 (20), 18:1 $n$ -9 (20), 16:0 (12), 18:4 $n$ -3 (8), 18:1 (4)                       |
| Yaich et al. [5]        | <i>Ulva lactuca</i>    | Wild                | Monastir, Tunisia                | July 2007      | 19.6                                     | 8.5                   | 54.9                | 7.9                 | 16:0 (59), 18:1 $n$ -9 (16), 16:1 $n$ -9 (7), 22:0 (4), 18:3 $n$ -3 (3), 18:2 $n$ -6 (2)           |

**Supplementary Table S4.** [Continued]

| Reference                     | Sample                 | Wild or cultivation | Location                    | Harvest time | Proximate composition (%DW) <sup>a</sup> |                       |                     |                     | Most abundant FA (% of total FA) <sup>c</sup>                                                                               |
|-------------------------------|------------------------|---------------------|-----------------------------|--------------|------------------------------------------|-----------------------|---------------------|---------------------|-----------------------------------------------------------------------------------------------------------------------------|
|                               |                        |                     |                             |              | Ash                                      | Proteins <sup>b</sup> | Sugars <sup>c</sup> | Lipids <sup>d</sup> |                                                                                                                             |
| Gosch et al. [6]              | <i>Ulva fleximosa</i>  | Wild                | North Queensland, Australia | na           |                                          |                       |                     | 6.5                 | 16:0 (25), 18:2 <i>n</i> -6 (13), 18:1 <i>n</i> -9 (10), 18:3 <i>n</i> -3 (7), 14:0 (5), 16:4 <i>n</i> -3 (5)               |
|                               | <i>Ulva rigida</i>     | Wild                | North Queensland, Australia | na           |                                          |                       |                     | 2.5, 3.2            | 16:0 (29), 18:4 <i>n</i> -3 (12), 18:3 <i>n</i> -3 (11), 16:4 <i>n</i> -3 (9), 18:1 <i>n</i> -9 (8), 16:1 <i>n</i> -7 (5)   |
| Khairy et al. [7]             | <i>Ulva lactuca</i>    | Wild                | Abu Qir Bay, Egypt          | April 2010   | 22.1                                     | 20.1                  | 44.8                | 4.1                 | 16:0 (60), 22:6 <i>n</i> -3 (10), 13:0 (8), 15:1 (5), 14:1 (5), 20:0 (2)                                                    |
|                               | <i>Ulva lactuca</i>    | Wild                | Abu Qir Bay, Egypt          | Aug 2010     | 17.6                                     | 17.9                  | 46.4                | 3.6                 | 16:0 (52), 22:6 <i>n</i> -3 (13), 13:0 (6), 18:0 (5), 15:1 (5)                                                              |
|                               | <i>Ulva lactuca</i>    | Wild                | Abu Qir Bay, Egypt          | Oct 2010     | 23.2                                     | 16.8                  | 42.1                | 3.1                 | 16:0 (53), 18:1 (12), 22:6 <i>n</i> -3 (5), 18:0 (5), 13:0 (4), 22:1 (3)                                                    |
| Pereira et al. [8]            | <i>Ulva</i> sp.        | Wild                | Algarve, Portugal           | May 2010     |                                          |                       |                     |                     | 16:0 (50), 18:3 <i>n</i> -3 (16), 16:1 <i>n</i> -7 (11), 18:2 <i>n</i> -6 (6), 18:1 <i>n</i> -9 (6)                         |
| Maehre et al. [9]             | <i>Ulva lactuca</i>    | Wild                | Norway                      | June 2012    | 29.3                                     | 8.7                   |                     | 2.6                 | 16:0 (26), 18:3 <i>n</i> -3 (15), 18:1 <i>n</i> -7 (15), 18:2 <i>n</i> -6 (11), 16:4 <i>n</i> -3 (7), 18:4 <i>n</i> -3 (6)  |
| Kendel et al. [10]            | <i>Ulva armoricana</i> | Wild                | Brittany, France            | June 2012    |                                          |                       |                     | 2.6                 | 16:0 (42), 18:1 <i>n</i> -7 (17), 18:4 <i>n</i> -3 (9), 18:2 <i>n</i> -3 (8), 16:4 <i>n</i> -3 (6), 18:2 <i>n</i> -6 (4)    |
| Serviere-Zaragoza et al. [11] | <i>Ulva lactuca</i>    | Wild                | El Rincón, Mexico           | May 2003     |                                          |                       |                     |                     | 16:0 (35), 18:4 <i>n</i> -3 (19), 18:3 <i>n</i> -3 (16), 18:1 <i>n</i> -7 (12), 16:4 <i>n</i> -3 (9), 18:2 <i>n</i> -6 (4)  |
|                               | <i>Ulva lactuca</i>    | Wild                | El Rincón, Mexico           | Aug 2003     |                                          |                       |                     |                     | 16:0 (34), 18:4 <i>n</i> -3 (15), 18:1 <i>n</i> -7 (14), 18:3 <i>n</i> -3 (12), 16:4 <i>n</i> -3 (8), 16:1 <i>n</i> -7 (5)  |
|                               | <i>Ulva lactuca</i>    | Wild                | El Rincón, Mexico           | Nov 2003     |                                          |                       |                     |                     | 16:0 (32), 18:4 <i>n</i> -3 (17), 18:1 <i>n</i> -7 (15), 18:3 <i>n</i> -3 (13), 16:4 <i>n</i> -3 (10), 16:1 <i>n</i> -7 (5) |
|                               | <i>Ulva lactuca</i>    | Wild                | El Rincón, Mexico           | Feb 2004     |                                          |                       |                     |                     | 16:0 (32), 18:4 <i>n</i> -3 (18), 18:1 <i>n</i> -7 (16), 18:3 <i>n</i> -3 (15), 16:4 <i>n</i> -3 (7), 16:1 <i>n</i> -7 (4)  |
|                               | <i>Ulva lactuca</i>    | Wild                | El Rincón, Mexico           | May 2004     |                                          |                       |                     |                     | 16:0 (37), 18:1 <i>n</i> -7 (18), 18:4 <i>n</i> -3 (16), 18:3 <i>n</i> -3 (14), 16:1 <i>n</i> -7 (5), 16:4 <i>n</i> -3 (4)  |
| Paiva et al. [12]             | <i>Ulva compressa</i>  | Wild                | Azores, Portugal            | April 2013   |                                          |                       |                     | 1.7                 | 16:0 (31), 18:1 <i>n</i> -11 (19), 18:3 <i>n</i> -6 (17), 17:1 <i>n</i> -7 (8), 18:2 <i>n</i> -6 (7), 18:1 <i>n</i> -9 (3)  |
|                               | <i>Ulva rigida</i>     | Wild                | Azores, Portugal            | April 2013   |                                          |                       |                     | 1.0                 | 16:0 (43), 18:3 <i>n</i> -6 (17), 18:1 <i>n</i> -9 (16), 18:2 <i>n</i> -6 (5), 20:4 <i>n</i> -6 (3), 20:1 <i>n</i> -9 (3)   |



**Supplementary Table S4.** [Continued]

| Reference               | Sample                   | Wild or cultivation | Location                   | Harvest time      | Proximate composition (%DW) <sup>a</sup> |                       |                     |                     | Most abundant FA (% of total FA) <sup>c</sup>                                                                                                        |
|-------------------------|--------------------------|---------------------|----------------------------|-------------------|------------------------------------------|-----------------------|---------------------|---------------------|------------------------------------------------------------------------------------------------------------------------------------------------------|
|                         |                          |                     |                            |                   | Ash                                      | Proteins <sup>b</sup> | Sugars <sup>c</sup> | Lipids <sup>d</sup> |                                                                                                                                                      |
| Cardoso et al. [13]     | <i>Ulva lactuca</i>      | Cultivation         | Olhão, Portugal            | July <sup>†</sup> |                                          |                       |                     |                     | 16:0 (19), 16:3 <i>n</i> -3 + 16:4 <i>n</i> -3 (11), 18:2 <i>n</i> -6 (10), 14:0 (9), 18:1 <i>n</i> -7 + 18:1 <i>n</i> -9 (8), 20:4 <i>n</i> -6 (2)  |
|                         | <i>Ulva prolifera</i>    | Cultivation         | Olhão, Portugal            | July <sup>†</sup> |                                          |                       |                     |                     | 18:2 <i>n</i> -6 (22), 16:0 (21), 18:1 <i>n</i> -7 + 18:1 <i>n</i> -9 (12), 14:0 (11), 16:3 <i>n</i> -3 + 16:4 <i>n</i> -3 (9), 20:5 <i>n</i> -3 (2) |
|                         | <i>Ulva intestinalis</i> | Cultivation         | Olhão, Portugal            | July <sup>†</sup> |                                          |                       |                     |                     | 16:0 (19), 16:3 <i>n</i> -3 + 16:4 <i>n</i> -3 (11), 14:0 (9), 18:2 <i>n</i> -6 (8), 18:1 <i>n</i> -7+18:1 <i>n</i> -9 (7), 20:4 <i>n</i> -6 (2)     |
| Gadberry et al. [14]    | <i>Ulva</i> spp.         | Cultivation         | Manchester, USA            | Aug 2013-Sep2014  | 32                                       | 29.5                  |                     | 3.0                 |                                                                                                                                                      |
| Neto et al. [15]        | <i>Ulva rigida</i>       | Cultivation         | Ria de Aveiro, Portugal    | July 2016         | 31.7                                     | 9.3                   | 58.1                | 0.9                 |                                                                                                                                                      |
| Lopes et al. [16]       | <i>Ulva rigida</i>       | Cultivation         | Ria de Aveiro, Portugal    | Nov 2016          | 26.47                                    | 17.75                 | 53.25               | 2.53                | 16:0 (43), 18:0 (19), 18:4 <i>n</i> -3 (9), 18:1 (9), 18:3 <i>n</i> -3 (4), 16:4 <i>n</i> -3 (4)                                                     |
| Mohy El-Din et al. [17] | <i>Ulva lactuca</i>      | Wild                | Abu Qir Bay, Egypt         | Summer 2016       | 24.5                                     | 20.3                  | 19.5                | 3.8                 |                                                                                                                                                      |
|                         | <i>Ulva lactuca</i>      | Wild                | Abu Qir Bay, Egypt         | Autumn 2016       | 21.5                                     | 18.2                  | 18.4                | 3.2                 |                                                                                                                                                      |
|                         | <i>Ulva lactuca</i>      | Wild                | Abu Qir Bay, Egypt         | Winter 2017       | 28.9                                     | 15.7                  | 17.2                | 2.8                 |                                                                                                                                                      |
|                         | <i>Ulva lactuca</i>      | Wild                | Abu Qir Bay, Egypt         | Spring 2017       | 28.3                                     | 23.2                  | 18.9                | 4.1                 |                                                                                                                                                      |
| da Costa et al. [18]    | <i>Ulva rigida</i>       | Cultivation         | Ria de Aveiro, Portugal    | Summer 2018       | 27.79                                    | 8.55                  | 63.26               | 0.4                 |                                                                                                                                                      |
|                         | <i>Ulva</i> spp.         | Wild                | Ria de Arousa, Spain       | Summer 2018       | 25.4                                     | 6.6                   | 67.5                | 0.5                 |                                                                                                                                                      |
|                         | <i>Ulva</i> spp.         | Wild                | Ria de Pontevedra, Spain   | Summer 2018       | 22.2                                     | 9.9                   | 66.2                | 1.8                 |                                                                                                                                                      |
|                         | <i>Ulva</i> spp.         | Wild                | Ria de Vigo, Spain         | Summer 2018       | 25.6                                     | 4.7                   | 69.2                | 0.5                 |                                                                                                                                                      |
|                         | <i>Ulva</i> spp.         | Wild                | Viana do Castelo, Portugal | Summer 2018       | 20.2                                     | 8.6                   | 70.6                | 0.6                 |                                                                                                                                                      |
|                         | <i>Ulva</i> spp.         | Wild                | Peniche, Portugal          | Summer 2018       | 27.3                                     | 18.1                  | 53.4                | 1.2                 |                                                                                                                                                      |
|                         | <i>Ulva</i> spp.         | Wild                | Sado Estuary, Portugal     | Summer 2018       | 13.5                                     | 12.6                  | 73.6                | 0.4                 |                                                                                                                                                      |

**Supplementary Table S4.** [Continued]

| Reference            | Sample              | Wild or cultivation | Location                | Harvest time  | Proximate composition (%DW) <sup>a</sup> |                        |                        |                       | Most abundant FA (% of total FA) <sup>e</sup>                                                       |
|----------------------|---------------------|---------------------|-------------------------|---------------|------------------------------------------|------------------------|------------------------|-----------------------|-----------------------------------------------------------------------------------------------------|
|                      |                     |                     |                         |               | Ash                                      | Proteins <sup>b</sup>  | Sugars <sup>c</sup>    | Lipids <sup>d</sup>   |                                                                                                     |
| da Costa et al. [18] | <i>Ulva</i> spp.    | Wild                | Albufeira, Portugal     | Summer 2018   | 18.5                                     | 9.1                    | 71.9                   | 0.5                   |                                                                                                     |
|                      | <i>Ulva</i> spp.    | Wild                | Ria Formosa, Portugal   | Summer 2018   | 14.77                                    | 6.2                    | 78.7                   | 0.3                   |                                                                                                     |
| Moreira et al. [19]  | <i>Ulva rigida</i>  | Cultivation         | Ria de Aveiro, Portugal | August 2016   |                                          |                        |                        | 1.7                   | 16:0 (44), 18:0 (13), 18:1 (11), 18:3 <i>n</i> -3 (8), 18:4 <i>n</i> -3 (8), 16:4 <i>n</i> -3 (6)   |
|                      | <i>Ulva rigida</i>  | Cultivation         | Ria de Aveiro, Portugal | November 2016 |                                          |                        |                        | 2.7                   | 16:0 (31), 18:4 <i>n</i> -3 (14), 18:0 (12), 16:4 <i>n</i> -3 (11), 18:1 (8), 18:3 <i>n</i> -3 (8)  |
|                      | <i>Ulva rigida</i>  | Cultivation         | Ria de Aveiro, Portugal | March 2017    |                                          |                        |                        | 3.4                   | 16:0 (27), 18:4 <i>n</i> -3 (20), 16:4 <i>n</i> -3 (14), 18:3 <i>n</i> -3 (10), 18:0 (10), 18:1 (7) |
|                      | <i>Ulva rigida</i>  | Cultivation         | Ria de Aveiro, Portugal | May 2017      |                                          |                        |                        | 2.2                   | 16:0 (30), 18:4 <i>n</i> -3 (17), 16:4 <i>n</i> -3 (12), 18:3 <i>n</i> -3 (10), 18:1 (9), 18:0 (9)  |
| Roleda et al. [20]   | <i>Ulva lactuca</i> | Cultivation         | Nordland, Norway        | 2016-2017     | 20-25 <sup>‡</sup>                       | 13.1-14.5 <sup>‡</sup> | 41.4-58.8 <sup>‡</sup> | 9.7-13.7 <sup>‡</sup> |                                                                                                     |

<sup>a</sup> Values presented (round to decimals) are mean values from results expressed as percentage of the dry weight (%DW).

<sup>b</sup> Protein content determined using nitrogen-protein conversion factor 6.25, except in studies of Maehre et al and Rodela et al (sum of total amino acids). In studies using nitrogen-protein conversion, different methods were used to determine nitrogen content, namely elemental analysis and Kjeldahl method.

<sup>c</sup> Carbohydrates (and others) determined by difference, except in studies of Roleda et al. (sum of neutral and acid monosaccharides), and Khairy et al. and Mohy El-Din et al. (Dubois method). Value from the study of Yaich et al. is related to total dietary fiber.

<sup>d</sup> Different adaptations of Bligh and Dyer and Folch methods or Soxhlet extraction were used to obtain lipid extracts.

<sup>e</sup> Values in parentheses (round to units) are mean values from results expressed as percentage of the total of fatty acids (FA).

<sup>†</sup> Year not available, <sup>‡</sup> Range of different strains, na - not available

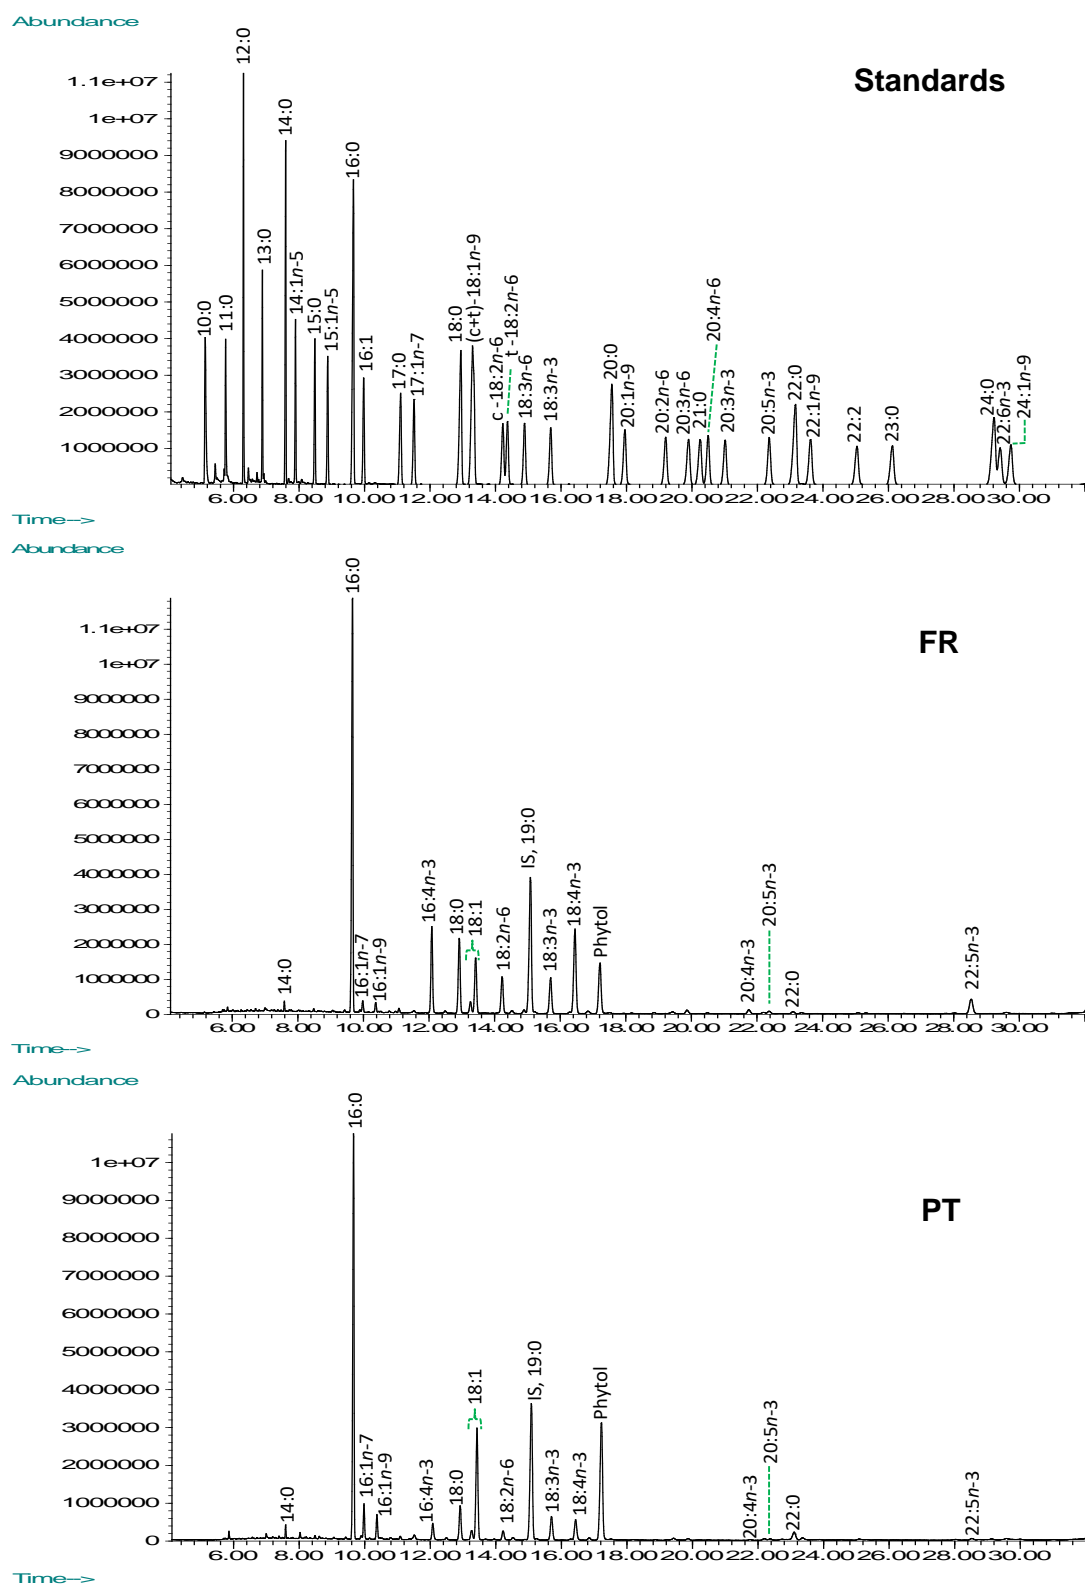

**Supplementary Figure S1.** Representative examples of total ion chromatograms (TIC) obtained by GC–MS analysis of the FAME standards (Supelco 37 Component FAME Mix, Sigma-Aldrich, Darmstadt, Germany) and the polar lipids extracts of *Ulva* spp. from Portugal (PT) and France (FR).

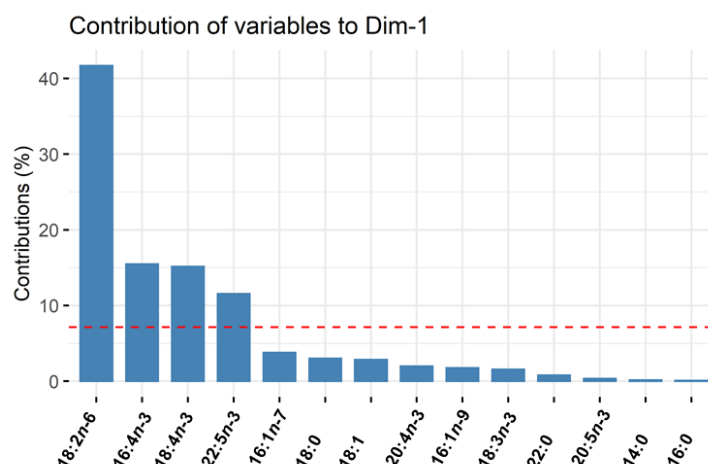

**Supplementary Figure S2.** Variables ordered by contribution (%) to dimension (dim) 1 of the principal component analysis (PCA) of esterified fatty acids dataset.

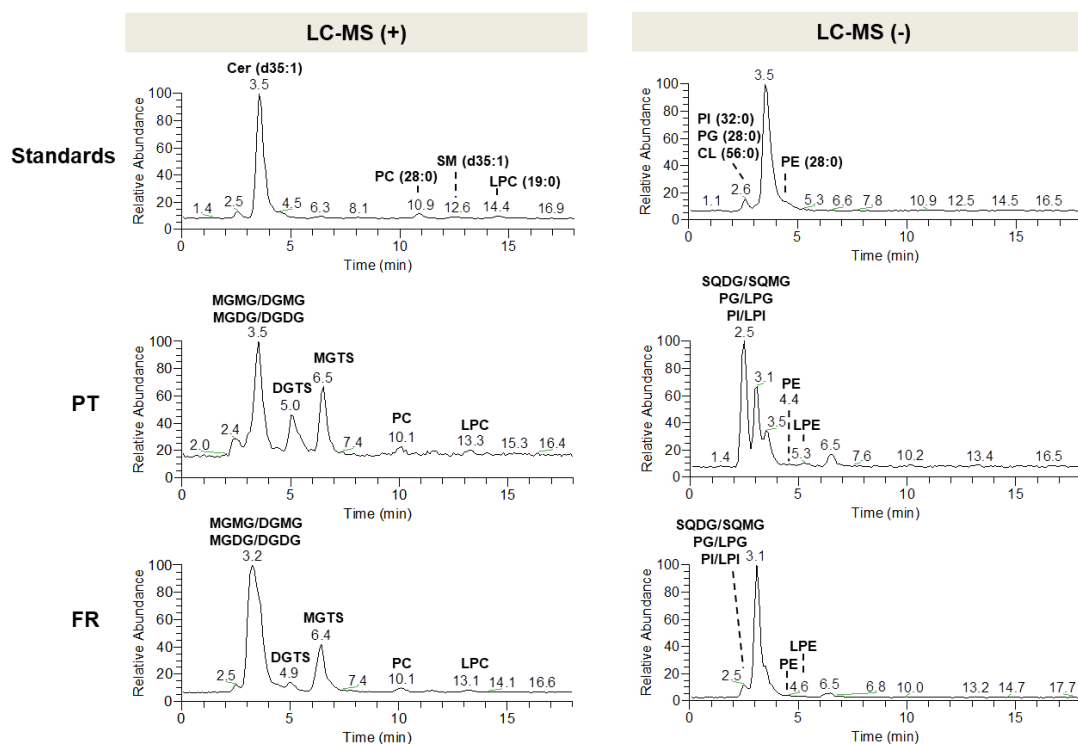

**Supplementary Figure S3.** Representative examples of total ion chromatograms (TIC) obtained by LC–MS analysis of the lipid standards and the polar lipids extracts of *Ulva* spp. from Portugal (PT) and France (FR), acquired on positive mode (+) and negative mode (-).

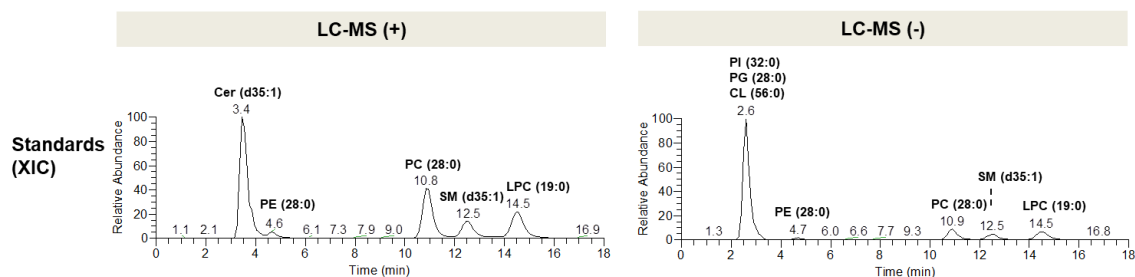

**Supplementary Figure S4.** Extracted ion chromatograms (XIC) obtained by LC–MS analysis of the lipid standards, acquired on positive mode (+) and negative mode (-).

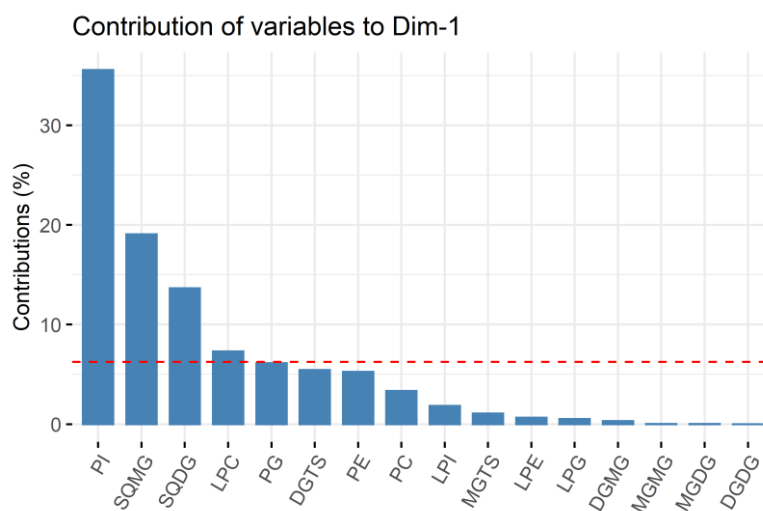

**Supplementary Figure S5.** Variables ordered by contribution (%) to dimension (dim) 1 of the principal component analysis (PCA) of lipid classes dataset.

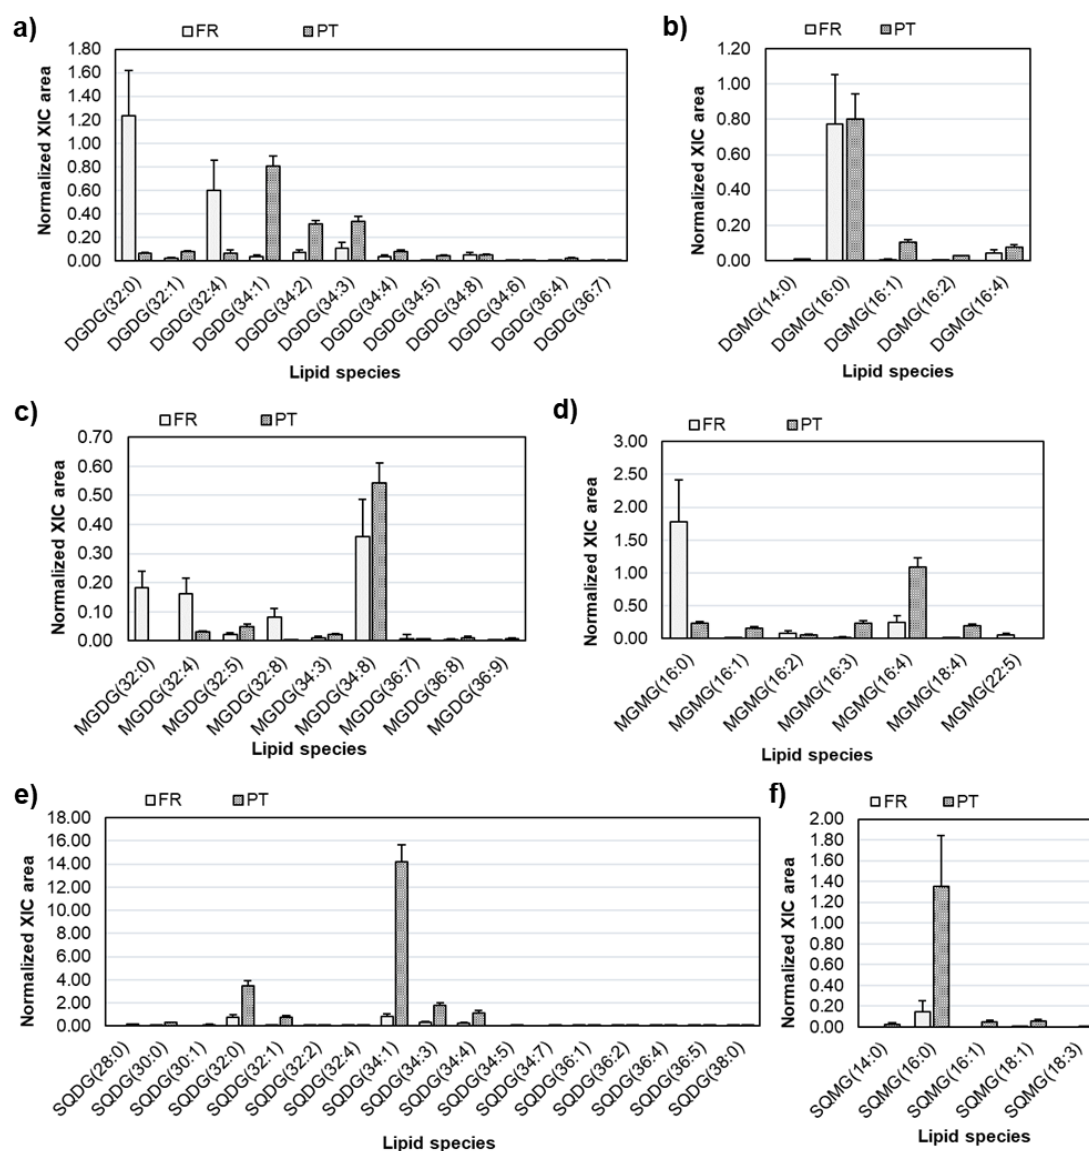

**Supplementary Figure S6.** Abundance (normalized XIC area) of glycolipid species identified by LC–MS and MS/MS of *Ulva* spp. samples from France (FR) and Portugal (PT), presented by class: a) DGDG, b) DGMG, c) MGDG, d) MGMG, e) SQDG, and f) SQMG species. Lipid species are labelled as follows: AAAA(C:D) (AAAA, lipid class abbreviation; C, number of carbon atoms in fatty acid(s); D, number of double bonds in fatty acid(s)).

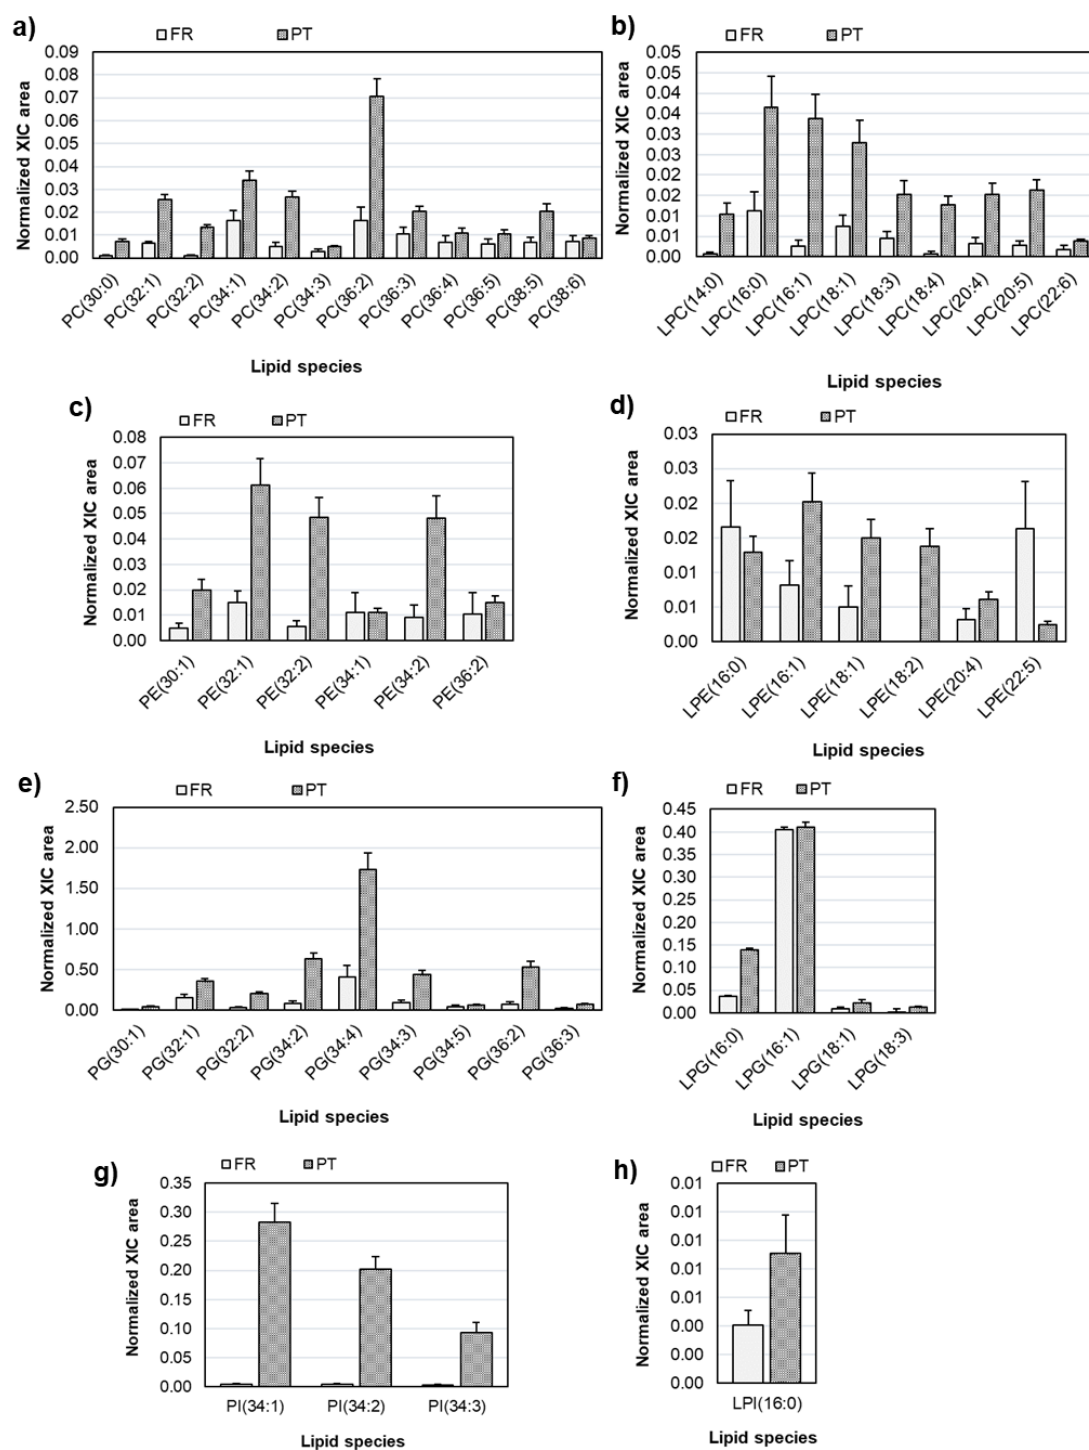

**Supplementary Figure S7.** Abundance (normalized XIC area) of phospholipid species identified by LC-MS and MS/MS of *Ulva* spp. samples from France (FR) and Portugal (PT), presented by class: a) PC, b) LPC, c) PE, d) LPE, e) PG, f) LPG, g) PI, and h) LPI species. Lipid species are labelled as follows: AAAA(C:D) (AAAA, lipid class abbreviation; C, number of carbon atoms in fatty acid(s); D, number of double bonds in fatty acid(s)).

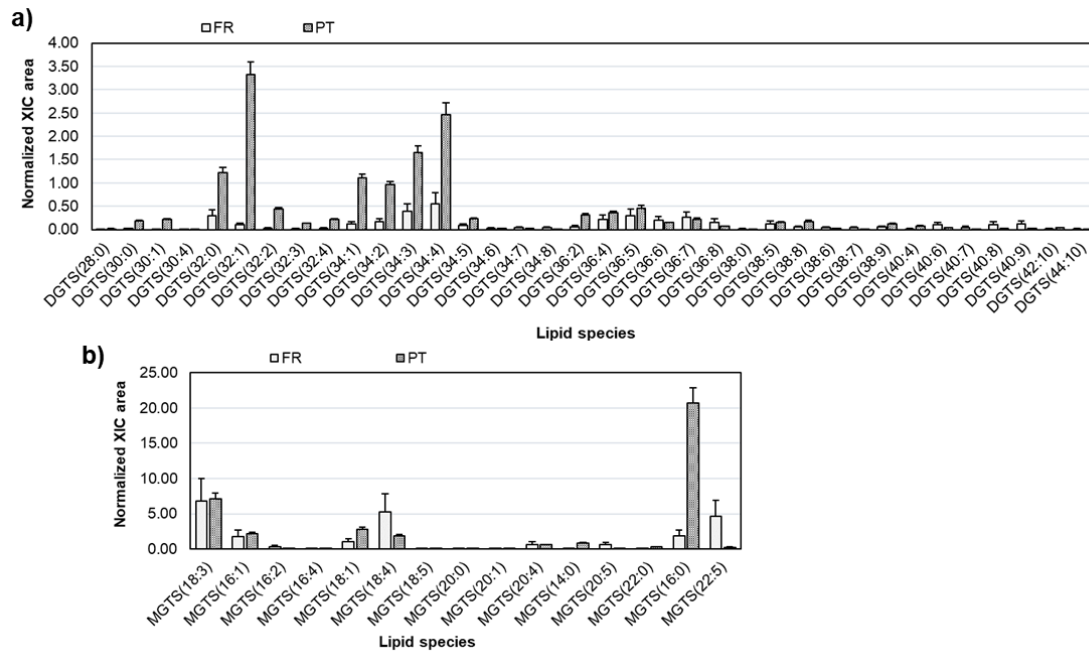

**Supplementary Figure S8.** Abundance (normalized XIC area) of betaine lipid species identified by LC–MS and MS/MS of *Ulva* spp. samples from France (FR) and Portugal (PT), presented by class: a) DGTS and b) MGTS species. Lipid species are labelled as follows: AAAA(C:D) (AAAA, lipid class abbreviation; C, number of carbon atoms in fatty acid(s); D, number of double bonds in fatty acid(s)).

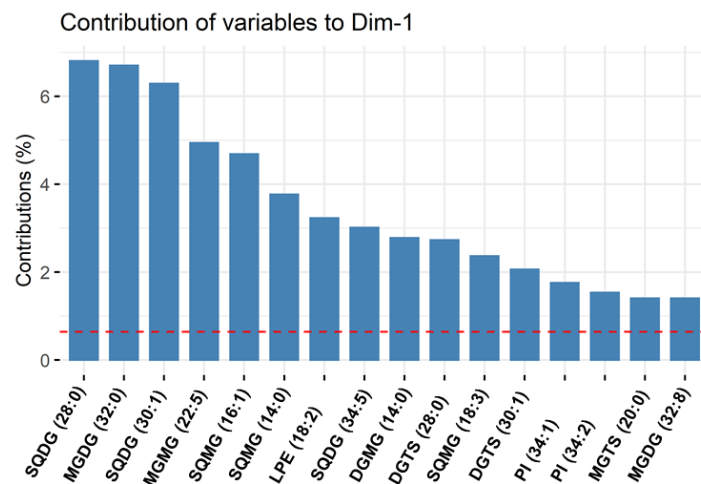

**Supplementary Figure S9.** Variables ordered by contribution (%) to dimension (dim) 1 of the principal component analysis (PCA) of lipid species dataset. Lipid species are labelled as follows: AAAA(C:D) (AAAA, lipid class abbreviation; C, number of carbon atoms in fatty acid(s); D, number of double bonds in fatty acid(s)).



## REFERENCES

1. Fleurence, J.; Gutbier, G.; Mabeau, S.; Leray, C. Fatty acids from 11 marine macroalgae of the French Brittany coast. *J. Appl. Phycol.* **1994**, *6*, 527-532.
2. Nelson, M.M.; Phleger, C.F.; Nichols, P.D. Seasonal lipid composition in macroalgae of the northeastern pacific ocean. *Bot. Mar.* **2002**, *45*, 58-65.
3. Kumari, P.; Kumar, M.; Gupta, V.; Reddy, C.R.K.; Jha, B. Tropical marine macroalgae as potential sources of nutritionally important PUFAs. *Food Chem.* **2010**, *120*, 749-757.
4. van Ginneken, V.J.; Helsper, J.P.; de Visser, W.; van Keulen, H.; Brandenburg, W.A. Polyunsaturated fatty acids in various macroalgal species from North Atlantic and tropical seas. *Lipids Health Dis* **2011**, *10*, 10-104.
5. Yaich, H.; Garna, H.; Besbes, S.; Paquot, M.; Blecker, C.; Attia, H. Chemical composition and functional properties of *Ulva lactuca* seaweed collected in Tunisia. *Food Chem.* **2011**, *128*, 895-901.
6. Gosch, B.J.; Magnusson, M.; Paul, N.A.; de Nys, R. Total lipid and fatty acid composition of seaweeds for the selection of species for oil-based biofuel and bioproducts. *GCB Bioenergy* **2012**, *4*, 919-930.
7. Khairy, H.M.; El-Shafay, S.M. Seasonal variations in the biochemical composition of some common seaweed species from the coast of Abu Qir Bay, Alexandria, Egypt. *Oceanologia* **2013**, *55*, 435-452.
8. Pereira, H.; Barreira, L.; Figueiredo, F.; Custódio, L.; Vizetto-Duarte, C.; Polo, C.; Rešek, E.; Engelen, A.; Varela, J. Polyunsaturated fatty acids of marine macroalgae: potential for nutritional and pharmaceutical applications. *Mar. Drugs* **2012**, *10*.
9. Maehre, H.K.; Malde, M.K.; Eilertsen, K.E.; Elvevoll, E.O. Characterization of protein, lipid and mineral contents in common Norwegian seaweeds and evaluation of their potential as food and feed. *J Sci Food Agric* **2014**, *94*, 3281-3290.
10. Kendel, M.; Wielgosz-Collin, G.; Bertrand, S.; Roussakis, C.; Bourgougnon, N.; Bedoux, G. Lipid composition, fatty acids and sterols in the seaweeds *Ulva armoricana*, and *Solieria chordalis* from Brittany (France): An analysis from nutritional, chemotaxonomic, and antiproliferative activity perspectives. *Mar. Drugs* **2015**, *13*, 5606-5628.
11. Serviere-Zaragoza, E.; Hurtado, M.A.; Manzano-Sarabia, M.; Mazariegos-Villarreal, A.; Reza, M.; Arjona, O.; Palacios, E. Seasonal and interannual variation of fatty acids in macrophytes from the Pacific coast of Baja California Peninsula (Mexico). *J. Appl. Phycol.* **2015**, *27*, 1297-1306.
12. Paiva, L.; Lima, E.; Neto, A.I.; Marcone, M.; Baptista, J. Health-promoting ingredients from four selected Azorean macroalgae. *Food Res Int* **2016**, *89*, 432-438.
13. Cardoso, C.; Ripol, A.; Afonso, C.; Freire, M.; Varela, J.; Quental-Ferreira, H.; Pousão-Ferreira, P.; Bandarra, N. Fatty acid profiles of the main lipid classes of green seaweeds from fish pond aquaculture. *Food Sci Nutr* **2017**, *5*, 1186-1194.
14. Gadberry, B.A.; Colt, J.; Maynard, D.; Boratyn, D.C.; Webb, K.; Johnson, R.B.; Saunders, G.W.; Boyer, R.H. Intensive land-based production of red and green macroalgae for human consumption in the Pacific Northwest: an evaluation of seasonal growth, yield, nutritional composition, and contaminant levels. *Algae* **2018**, *33*, 109-125.

15. Neto, R.T.; Marçal, C.; Queirós, A.S.; Abreu, H.; Silva, A.M.S.; Cardoso, S.M. Screening of *Ulva rigida*, *Gracilaria* sp., *Fucus vesiculosus* and *Saccharina latissima* as functional ingredients. *Int. J. Mol. Sci.* **2018**, *19*, 2987.
16. Lopes, D.; Moreira, A.S.P.; Rey, F.; da Costa, E.; Melo, T.; Maciel, E.; Rego, A.; Abreu, M.H.; Domingues, P.; Calado, R.; Lillebø, A.I.; Domingues, M.R. Lipidomic signature of the green macroalgae *Ulva rigida* farmed in a sustainable integrated multi-trophic aquaculture. *J. Appl. Phycol.* **2019**, *31*, 1369–1381.
17. Mohy El-Din, S.M. Temporal variation in chemical composition of *Ulva lactuca* and *Corallina mediterranea*. *Int. J. Environ. Sci. Technol.* **2019**, *16*, 5783–5796.
18. da Costa, E.; Ricardo, F.; Melo, T.; Mamede, R.; Abreu, M.H.; Domingues, P.; Domingues, M.R.; Calado, R. Site-specific lipidomic signatures of sea lettuce (*Ulva* spp., Chlorophyta) hold the potential to trace their geographic origin. *Biomolecules* **2020**, *10*, 489.
19. Moreira, A.S.P.; da Costa, E.; Melo, T.; Sulpice, R.; Cardoso, S.M.; Pitarma, B.; Pereira, R.; Abreu, M.H.; Domingues, P.; Calado, R.; Domingues, M.R. Seasonal plasticity of the polar lipidome of *Ulva rigida* cultivated in a sustainable integrated multi-trophic aquaculture. *Algal Res.* **2020**, *49*, 101958.
20. Roleda, M.Y.; Lage, S.; Aluwini, D.F.; Rebours, C.; Brurberg, M.B.; Nitschke, U.; Gentili, F.G. Chemical profiling of the Arctic sea lettuce *Ulva lactuca* (Chlorophyta) mass-cultivated on land under controlled conditions for food applications. *Food Chem.* **2021**, *341*, 127999.
